# Supplementary material
Source: ML conference proceedings conference paper supplement (https://openaccess.thecvf.com/content/CVPR2023/html/Bhunia_Sketch2Saliency_Learning_To_CVPR_2023_paper.html)
Supplement: Supplementary file 1 [file Bhunia_Sketch2Saliency_Learning_To_CVPR_2023_supplemental.pdf]

# Supplementary material for Sketch2Saliency: Learning to Detect Salient Objects from Human Drawings

Ayan Kumar Bhunia<sup>1</sup>   Subhadeep Koley<sup>1,2</sup>   Amandeep Kumar\*   Aneeshan Sain<sup>1,2</sup>  
Pinaki Nath Chowdhury<sup>1,2</sup>   Tao Xiang<sup>1,2</sup>   Yi-Zhe Song<sup>1,2</sup>

<sup>1</sup>SketchX, CVSSP, University of Surrey, United Kingdom.

<sup>2</sup>iFlyTek-Surrey Joint Research Centre on Artificial Intelligence.

{a.bhunias, s.koley, a.sain, p.chowdhury, t.xiang, y.song}@surrey.ac.uk

## A. Sketch Vector Normalisation

Firstly, denoting sketch-vectors as a sequence of five-element vectors with *off-set* values over absolute coordinate is common in sketch/handwriting literature [1, 4, 7]. It mainly models the free-flow nature of drawing via GMM [6]. Regressing to absolute coordinates otherwise, results in mean output [2] without any instance-specific variation. Secondly, offset makes sketch invariant to drawing-position in a sketch-canvas (Fig. 2). Keeping rest of the design same, replacing GMM-based loss by standard  $l_1$  loss based absolute coordinate regression, reduces max  $F_\beta$  value on ECSSD dataset to 0.652 from 0.781 (ours), thus validating the need of off-set and GMM-based design. Furthermore, sketch-vector-length varies across samples in a batch, a specific pen-state for end-of-drawing is needed to mask out loss computation from zero-appended tails of sketch-vector.

## B. Multi-scale 2D Attention Module

(i)  $J$  is an intermediate tensor, which is aware of three factors: (a) local and (b) neighbourhood information, of  $\mathcal{B}$ , and (c) previous state of auto-regressive decoder for sequential modelling. Later,  $J \in \mathbb{R}^{\frac{H}{32} \times \frac{W}{32} \times d}$  helps compute the attention-map  $\alpha$ . (ii)  $\mathcal{B}(i, j)$  signifies the  $1 \times 1$  convolution applied at every  $(i, j)$  spatial position for local-information modelling. (iii) The first two terms are tensors of size  $\mathbb{R}^{\frac{H}{32} \times \frac{W}{32} \times d}$  and  $W_{s, s_{t-1}}$  is a vector of size  $\mathbb{R}^d$  which is broadcasted (standard PyTorch convention) to the required spatial size for addition. (iv) Eq. 1 is employed using  $1 \times 1$  convolution with kernel  $W_a$ , where softmax is applied across the spatial size,  $g_t \in \mathbb{R}^d$ . (v) Output of the last three max-pooling layers of VGG-16 are used for multi-scale feature aggregation which have a spatial down-scaling factor of 8, 16, 32, respectively. (vi) During single-scale ablative setup, we only use the output feature-map of the last pooling layer  $\mathcal{F}^l$ .

## C. Scribbles vs Sketch

Despite taking more time, sketches hold way more structural and semantic cues than the much *sparser* and *zero-semantics* scribbles [9]. Also, temporal aspect of sketches may initiate future works on *relative saliency* of objects at scene level.

## D. Advantage of Sequential Stroke Modelling

Firstly, as free-hand sketches are not edge-aligned with its paired photo, there is no direct way to post-process the sketch-coordinate to get aligned key-points attending the silhouettes/corners of the object. However, following [8], we design a baseline as: Apply a spatial attention module on backbone-extracted feature-map followed by global-average pooling and a fully-connected layer to directly predict the  $T = 100$  (fixed via RDP algorithm) absolute coordinates, assuming that the network will attend salient regions via spatial attention. Here max  $F_\beta$  on ECSSD dataset falls to 0.692. Importantly, we can not use off-set based representation here as by definition it relies on sequential modelling explicitly. Therefore, we adopted sequential stroke modelling with ‘look-back mechanism’ via multi-scale 2D-attention for our saliency framework.

(i) Moreover, our 1-layer LSTM based auto-regressive network is quite standard for works [1, 3, 4, 7] like image captioning, handwriting/sketch generation, text recognition, and simple to optimise. (ii) Removing pen-state prediction hurts accuracy

---

\*Interned with SketchX

( $\max F_\beta$ : 0.741) as the model gets confused for large-jumps at stroke-transitions via off-set-based modelling. (iii) Furthermore, this temporal aspect of sketch may potentially convey relative saliency (sorted by stroke order) – an interesting topic for future study.

## E. Correlating stroke-prediction and saliency-map quality

We used photo-to-sketch generation as an auxiliary task to solve the *saliency detection* problem, where performance of the latter is crucial but not the former. Moreover we found that, while avg.  $F_\beta^{\max}$  for samples whose sketch-generation metric, *log-loss*, (mean of Eq. 6 in nats [5] is lower (better) than  $-1100$ , comes to 0.824, the same for samples with *log-loss* higher (worse) than  $-1000$  drops to 0.736, thus justifying the correlation quantitatively.

## References

- [1] Ayan Kumar Bhunia, Pinaki Nath Chowdhury, Aneeshan Sain, Yongxin Yang, Tao Xiang, and Yi-Zhe Song. More photos are all you need: Semi-supervised learning for fine-grained sketch based image retrieval. In *CVPR*, 2021. 1
- [2] Ayan Kumar Bhunia, Ayan Das, Umar Riaz Muhammad, Yongxin Yang, Timothy M. Hospedales, Tao Xiang, Yulia Gryaditskaya, and Yi-Zhe Song. Pixelor: A competitive sketching ai agent. so you think you can beat me? In *Siggraph Asia*, 2020. 1
- [3] Ayan Kumar Bhunia, Aneeshan Sain, Amandeep Kumar, Shuvojit Ghose, Pinaki Nath Chowdhury, and Yi-Zhe Song. Joint visual semantic reasoning: Multi-stage decoder for text recognition. In *ICCV*, 2021. 1
- [4] Nan Cao, Xin Yan, Yang Shi, and Chaoran Chen. Ai-sketcher: a deep generative model for producing high-quality sketches. In *AAAI*, 2019. 1
- [5] Alex Graves. Generating sequences with recurrent neural networks. *arXiv preprint arXiv:1308.0850*, 2013. 2
- [6] David Ha and Douglas Eck. A neural representation of sketch drawings. *ICLR*, 2017. 1
- [7] Jifei Song, Kaiyue Pang, Yi-Zhe Song, Tao Xiang, and Timothy M Hospedales. Learning to sketch with shortcut cycle consistency. In *CVPR*, 2018. 1
- [8] Yu Zeng, Yunzhi Zhuge, Huchuan Lu, Lihe Zhang, Mingyang Qian, and Yizhou Yu. Multi-source weak supervision for saliency detection. In *CVPR*, 2019. 1
- [9] Jing Zhang, Xin Yu, Aixuan Li, Peipei Song, Bowen Liu, and Yuchao Dai. Weakly-supervised salient object detection via scribble annotations. In *CVPR*, 2020. 1
